# Supplementary material for: Functionalization of protein hexahistidine tags by functional nanoreactors
Source: Royal Society of Chemistry journal article supplement (doi:10.1039/c9nj03463c), 2019-01-01
Supplement: c9nj03463c1.pdf [file c9nj03463c1.pdf]

## Electronic Supplementary Information

# Functionalization of protein hexahistidine tags by functional nanoreactors

**Marco Paolino,<sup>a</sup> Michela Visintin,<sup>b</sup> Elisa Margotti,<sup>b</sup> Marco Visentini,<sup>b</sup> Laura Salvini,<sup>c</sup>  
Annalisa Reale,<sup>a</sup> Vincenzo Razzano,<sup>a</sup> Germano Giuliani,<sup>a</sup> Gianfranco Caselli,<sup>b</sup> Francesco  
Tavanti,<sup>d</sup> Maria Cristina Menziani,<sup>d</sup> Andrea Cappelli.<sup>\*,a</sup>**

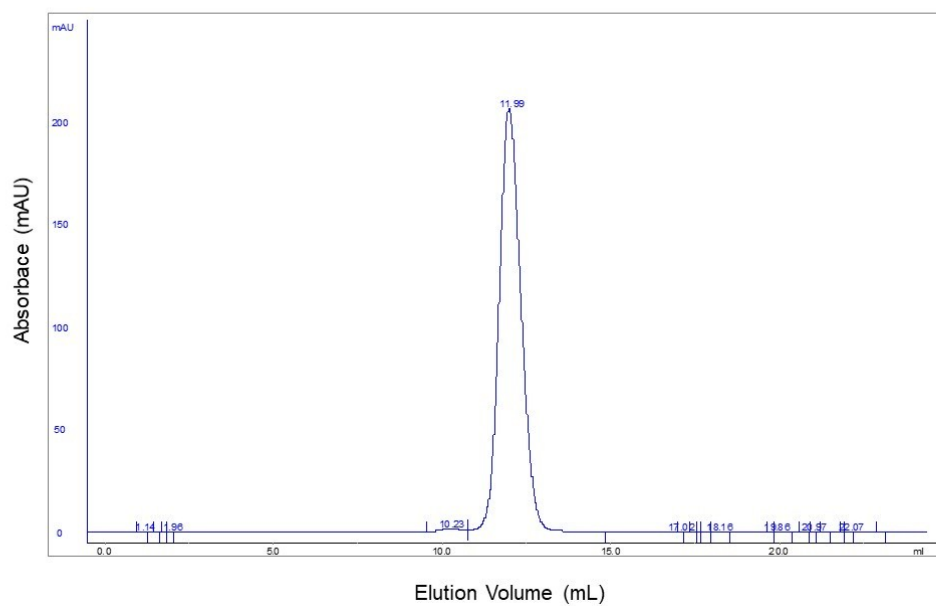

**Figure ESI1.** SEC profile (milli Absorbance Units, mAU at 280 nm plotted against Elution Volume, mL) of CRB0137. The scFv was diluted in PBS to a concentration of 1.25 mg/mL and loaded onto a Superdex 75 10/300 column (GE Healthcare) at a flow rate of 0.5 mL/min. CRB0137 Elution Volume is 11.99 mL. The monomer pool contained a residual aggregate level of 0.6%.

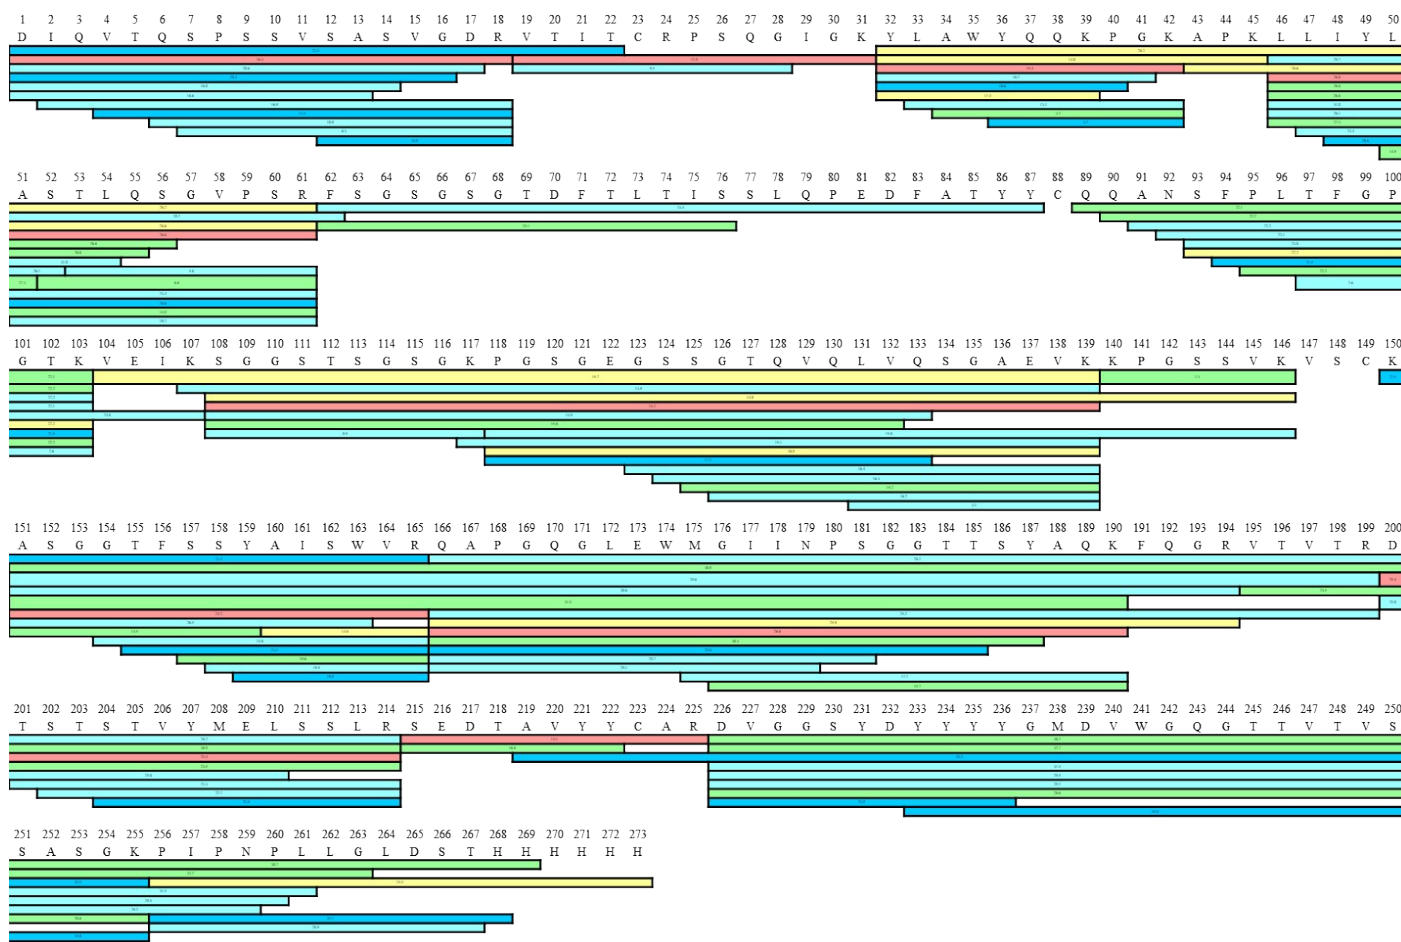

Color code for signal intensity

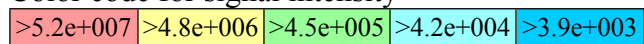

**Figure ESI2.** Sequence coverage map of CRB0137 digested with trypsin (98.5%), first experiment.

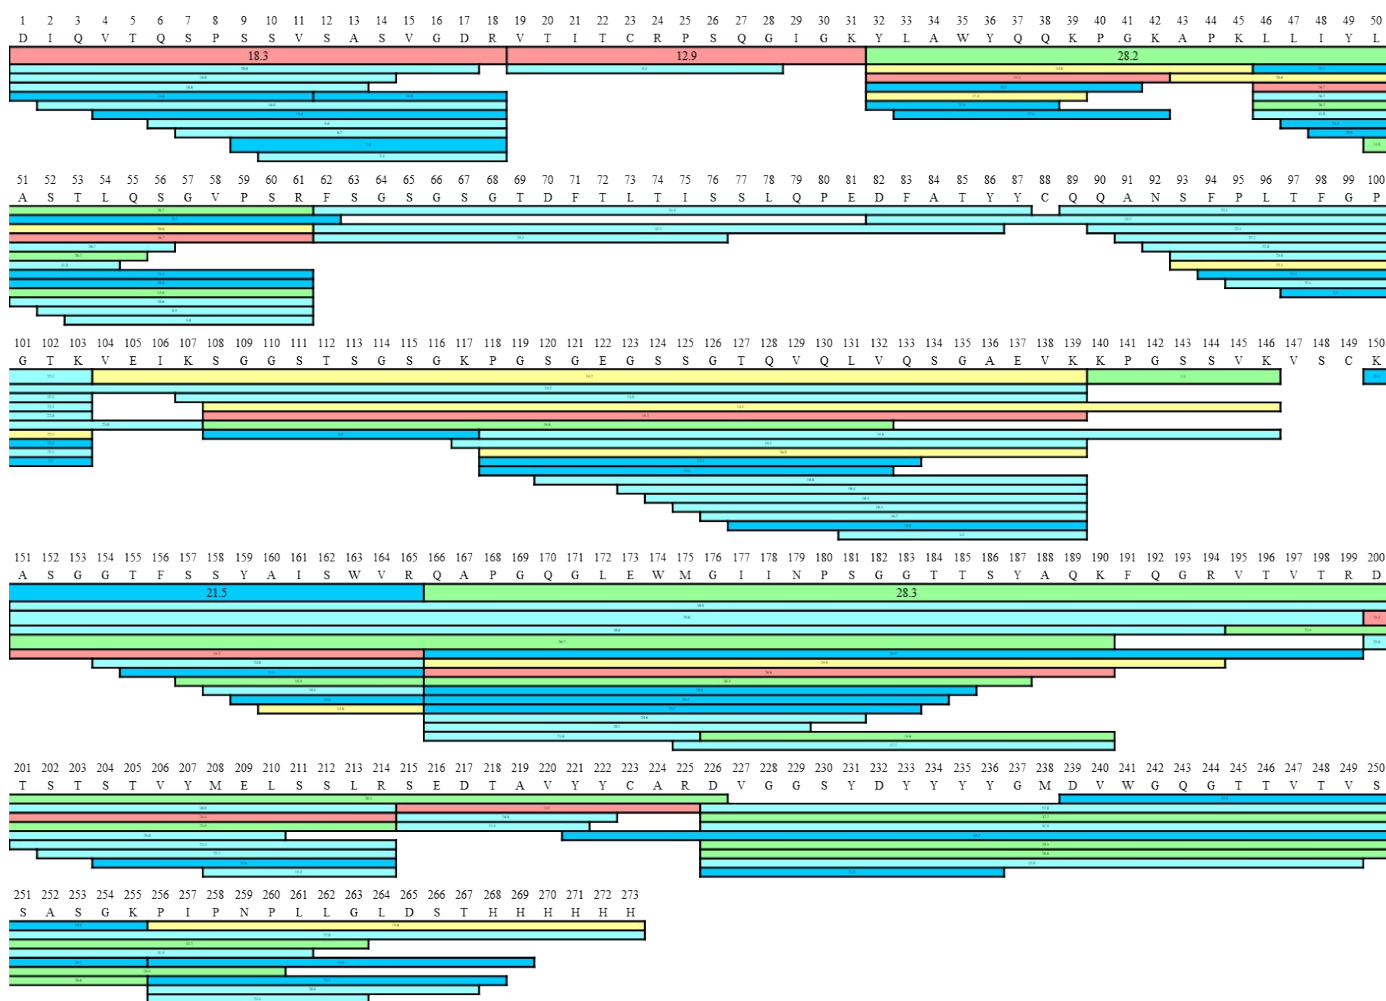

Color code for signal intensity

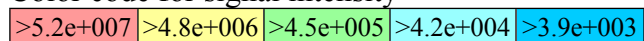

**Figure ESI3.** Sequence coverage map of CRB0137 digested with trypsin (98.9%), second experiment.

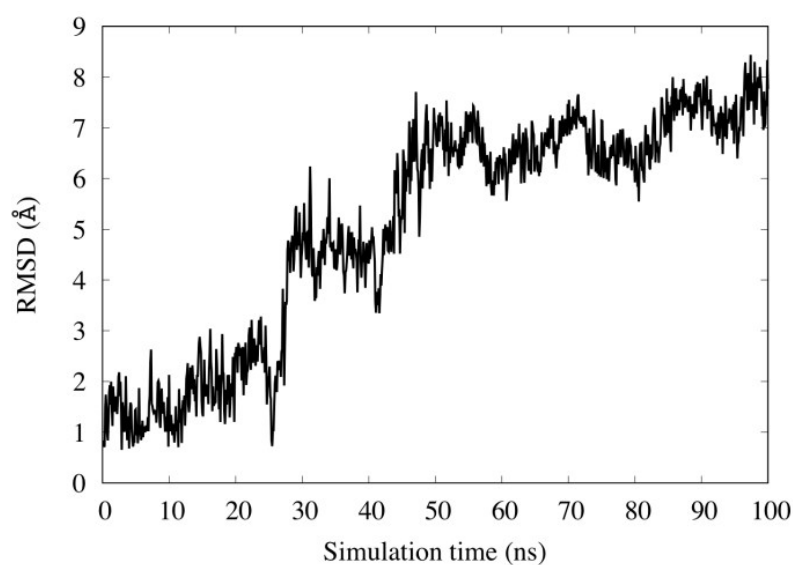

**Figure ESI4.** Root mean square deviations (rmsd) of the  $\alpha$ -carbon positions of the terminal stretch of amino acids  $^{259}\text{NPLLGLDSTHHHHH}^{273}$  during the dynamic run with respect to the initial positions.

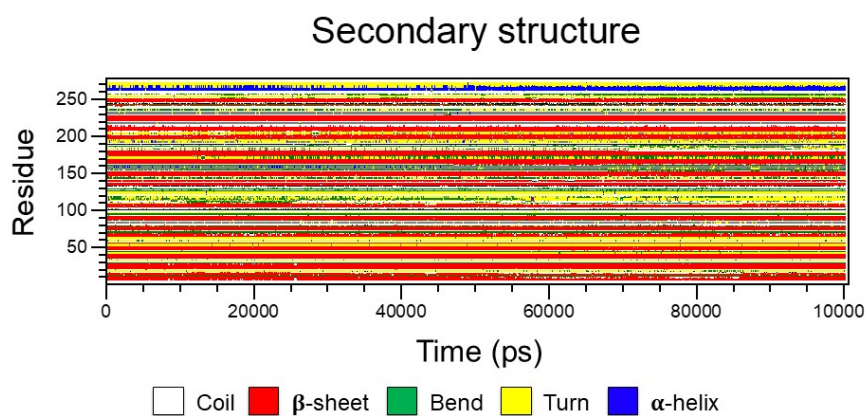

**Figure ESI5.** Evolution of the single-chain Fv antibody CRB0137 secondary structure during the 100 ns dynamics run.

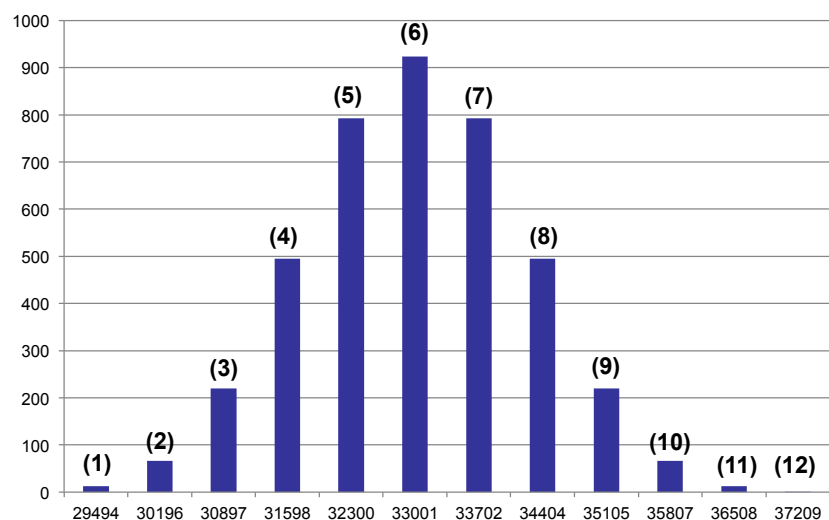

**Figure ESI6.** Simulated theoretical mass spectrum of the product of reaction between CRB0137 and MBHA derivative **3**. The value in parentheses is the number of naphthalene substituents (i. e. the grafting degree) for each CRB0137 molecule.

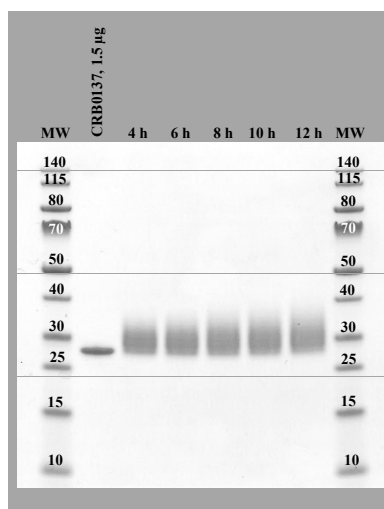

**Figure ESI7.** SDS-PAGE analysis of a kinetics experiment (reaction mixture after 4, 6, 8, 10, and 12 hours of reaction at 25 °C) compared with native CRB0137 molecule.

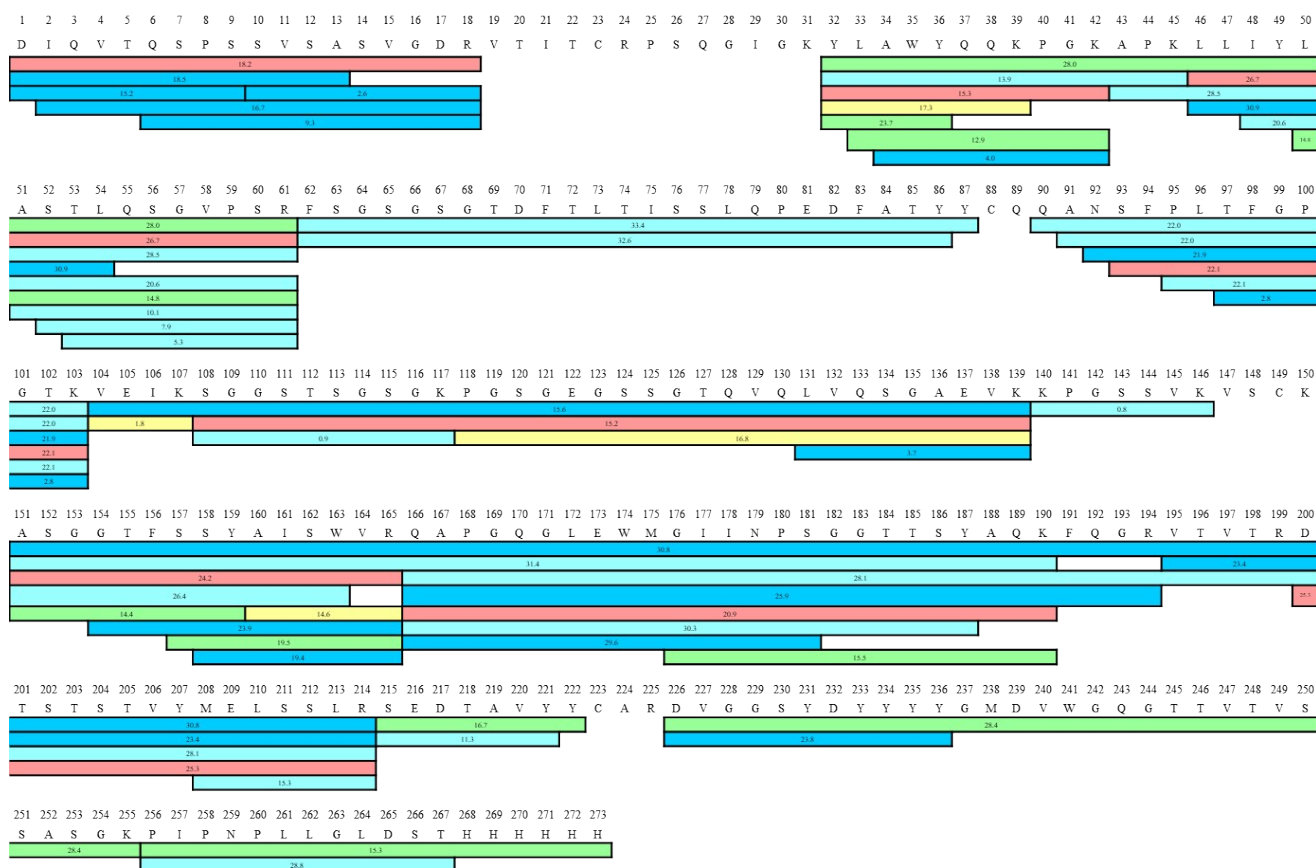

Color code for signal intensity

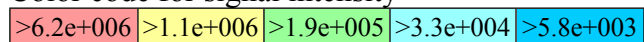

**Figure ESI8.** Sequence coverage map of the sample obtained after 8 h of reaction time digested with trypsin (91.9%).

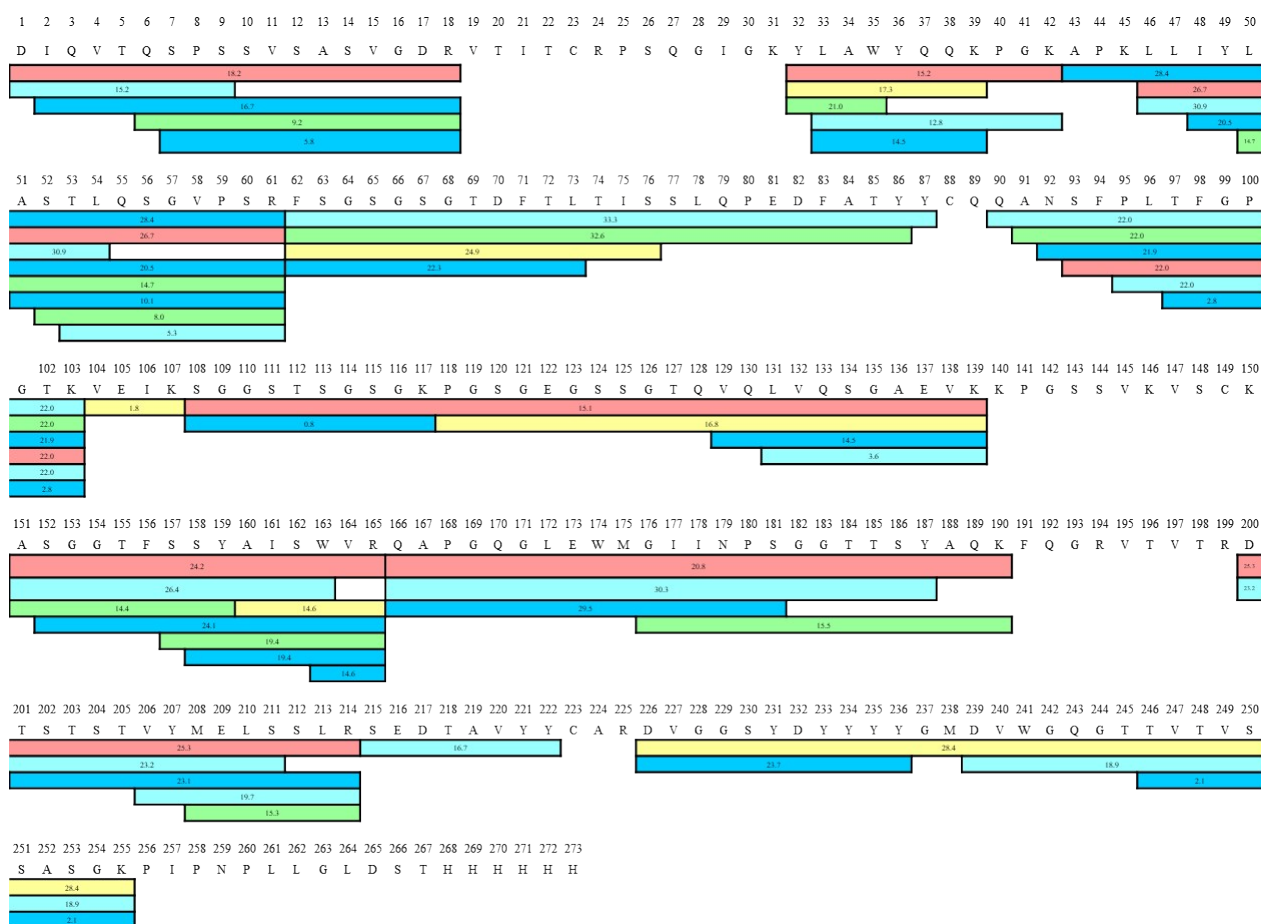

Color code for signal intensity

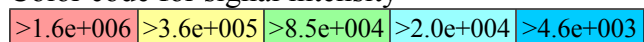

**Figure ESI9.** Sequence coverage map of the sample obtained after 12 h of reaction time digested with trypsin (79.5%).
